# Supplementary material for: An Event-Driven Classifier for Spiking Neural Networks Fed with Synthetic or Dynamic Vision Sensor Data
Source: PubMed Central journal article supplement (PMC5487436; doi:10.3389/fnins.2017.00350), 2017-06-28
Supplement: DataSheet1.pdf [file DataSheet1.pdf]

# ***Supplementary Material:*** **An Event-Driven Classifier for Spiking Neural Networks fed with Synthetic or Dynamic Vision Sensor Data**

**Evangelos Stomatias<sup>†,1</sup>, Miguel Soto<sup>†,1</sup>, Teresa Serrano-Gotarredona<sup>1</sup>, and  
Bernabé Linares-Barranco<sup>\*,1</sup>**

\*Correspondence:  
Bernabé Linares-Barranco  
bernabe@imse-cnm.csic.es

## **1 SUPPLEMENTARY DATA**

Details of the algorithms for the neuron models are given here. Algorithm 1 presents the convolutional module, while Algorithm 2 shows the fully-connected module as implemented in MegaSim.

## **2 CALCULATING THE CONFIDENCE INTERVALS**

The confidence intervals of the mean test error are computed using the following formula:

$$\hat{\mu} \pm z^* \left( \sqrt{\frac{\hat{\mu}(1 - \hat{\mu})}{N}} \right) \quad (\text{S1})$$

where  $\hat{\mu}$  is the estimated test error,  $N$  is the test set size, and  $z^*$  depends on the level of confidence. For this work we used a 99% confidence interval so  $z^*$  is set to 2.578.

```

function module_conv (eventin, tactual);
Input : AER input event as an integer array of 3 elements: eventin, and tactual time of the input AER
        event
        THplus, THminus,                                ▷ Positive/negative threshold
        TLplus, TLminus,                                ▷ Positive/negative leakage
        THPlusInfo, THMinusInfo,                       ▷ Enable events
        MembReset,                                     ▷ Membrane reset
        Trefract,                                       ▷ Refractory period
        FmYSize, FmXSize,                               ▷ Feature map size
        kYSize, kXSize,                                 ▷ Kernel size
        DX, DY                                          ▷ Kernel disposition
← get_fm_params();
for y = eventin[1] + DY, y < min(FmYSize, eventin[1] + DY + kYSize, y++) do
  for x = eventin[0] + DX, x < min(FmXSize, eventin[0] + DX + kXSize), x++ do
    Vmi ← get_neuron_membrane(x, y);
    ti.lastoutspike ← get_neuron_last_out_spike(x, y);
    ti.lastinspike ← get_neuron_last_in_spike(x, y);
    if ti.lastoutspike + Trefract ≤ tactual then
      if Vmi ≥ MembReset then
        if TLplus ≠ 0 then
          Vmi ← max(MembReset, Vmi - ((THplus - MembReset) ×
            (tactual - ti.lastinspike)) / TLplus);
        end
      else
        if TLminus ≠ 0 then
          Vmi ← min(MembReset, Vmi - ((THminus - MembReset) ×
            (tactual - ti.lastinspike)) / TLminus);
        end
      end
      w ← get_weight(x, y);
      Vmi ← Vmi + w;
      set_neuron_membrane(x, y, Vmi);
      // Threshold checking
      if Vmi ≥ THplus then
        if THplusInfo=1 then
          GenerateSpike(x, y, +1);
        end
      end
      else if Vmi ≤ THminus then
        if THminusInfo=1 then
          GenerateSpike(x, y, -1);
        end
      end
    end
  end
end
end

```

**Algorithm 1:** The convolutional module in MegaSim

```
function module_fully_connected (eventin, tactual);
```

**Input :** AER input event as an integer array of 3 elements: *event<sub>in</sub>*, and *t<sub>actual</sub>* time of the input AER event

```

THplus,
TLplus,
THplusInfo,
MembReset,
Trefract,
populationsize,
← get_population_params();
for n = 0, n < populationsize, n++ do
  Vmi ← get_neuron_membrane(n,0);
  ti_lastoutspike ← get_neuron_last_out_spike(n, 0);
  ti_lastinspike ← get_neuron_last_in_spike(n, 0);
  if ti_lastoutspike+Trefract ≤ tactual then
    if Vmi ≥ MembReset then
      if TLplus ≠ 0 then
        Vmi ← max(MembReset, Vmi - ((THplus - MembReset) ×
          (tactual - ti_lastinspike) ) / TLplus);
      end
    else
      if TLplus ≠ 0 then
        Vmi ← min(MembReset, Vmi - ((INT_MIN - MembReset) ×
          (tactual - ti_lastinspike) ) / TLplus);
      end
    end
    w ← get_weight(n, 0);
    Vmi ← Vmi + w ;
    set_neuron_membrane(n, 0, Vmi);
    // Threshold checking
    if Vmi ≥ THplus then
      if THplusInfo=1 then
        GenerateSpike(n, 0, +1);
      end
    end
  end
end
end

```

- ▷ Membrane threshold
- ▷ Membrane leakage
- ▷ Enable output events
  - ▷ Membrane reset
  - ▷ Refractory period
  - ▷ Population size

**Algorithm 2:** The fully-connected module in MegaSim
